# Supplementary material for: Space–time variability in soil moisture droughts in the Himalayan region
Source: Copernicus journal article supplement (doi:10.5194/hess-25-1761-2021), 2021-04-07
Supplement: Supplementary file 1 [file hess-25-1761-2021-supplement.zip]

Archive with 2 entries (2 files):
- Supplementary Tables_Figures_V3.DOCX
- hess-25-1761-2021-supplement-title-page.pdf
