# Supplementary material for: Space–time variability in soil moisture droughts in the Himalayan region
Source: Copernicus journal article supplement (doi:10.5194/hess-25-1761-2021), 2021-04-07
Supplement: Supplementary file 1 [file hess-25-1761-2021-supplement.zip › hess-25-1761-2021-supplement-title-page.pdf]

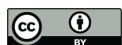

*Supplement of*

## **Space–time variability in soil moisture droughts in the Himalayan region**

**Santosh Nepal et al.**

*Correspondence to:* Santosh Nepal ([santosh.nepal@icimod.org](mailto:santosh.nepal@icimod.org))

- [hess-25-1761-2021-supplement-title-page.pdf](#)
- [Supplementary Tables\\_Figures\\_V3.DOCX](#)

The copyright of individual parts of the supplement might differ from the article licence.
