# Supplementary material for: Space–time variability in soil moisture droughts in the Himalayan region
Source: Copernicus journal article supplement (doi:10.5194/hess-25-1761-2021), 2021-04-07
Supplement: Supplementary file 1 [file hess-25-1761-2021-supplement.zip › Supplementary Tables_Figures_V3.DOCX]

# Supplementary Tables and Figures

**Table S1: List and sources for the spatial and climatic datasets used in the J2000 Model for the Koshi River Basin**

| **Data** | **Data Sources** | |
| --- | --- | --- |
| Digital Elevation Model (DEM) | ASTER GDEM 1 | |
| Land use map | Uddin et al. (2016) 2 | |
| Soil map | SOTER 3 | |
| Geology map | DMG (1994) 4 | |
| Meteorological data (stations numbers) | | |
| i. Precipitation (160) | DHM5, IMD6, APHRODITE7 | |
| ii. Temperature (60) | DHM, IMD, CFSR8 | |
| iii. Relative humidity (73) | DHM, IMD, CFSR | |
| iv. Wind (66) | DHM, IMD, CFSR | |
| v. Sunshine hours (4) | DHM | |
| Notes: | |  | |  |
| 1 ASTER GDEM: Advanced Spaceborne Thermal Emission and Reflection Radiometer. <https://asterweb.jpl.nasa.gov/gdem.asp> | | | | |
| 2 Uddin et al. (2016) <http://rds.icimod.org/Home/DataDetail?metadataId=9224> | | | |  |
| 3 SOTER: Soil and Terrain Databases, Food and Agriculture Organization of the United Nations (FAO). <http://www.fao.org/soils-portal/soil-survey/soil-maps-and-databases/regional-and-national-soil-maps-and-databases/en/>  4 DMG: Department of Mines and Geology, Nepal (based on physiographic division of Nepal) | | | | |
| 5 DHM: Department of Hydrology and Meteorology, Nepal. | | | | |
| 6 IMD: Indian Meteorological Department, India. | | | | |
| 7 APHRODITE: Asian Precipitation ‒ Highly-Resolved Observational Data Integration Towards Evaluation of Water Resources. (V1101) <http://www.chikyu.ac.jp/precip/english/>  8 CFSR: Climate Forecast System Reanalysis <https://climatedataguide.ucar.edu/climate-data/climate-forecast-system-reanalysis-cfsr> | | | | |

**Table S2: Monthly climatology for precipitation and temperature in three regions of the Koshi River basin, 1980‒2007**

| **Month** | **Precipitation [mm]** | | | **Temperature [ºC]** | | |
| --- | --- | --- | --- | --- | --- | --- |
| **Trans-Himalaya** | **Mountains** | **Plains** | **Trans-Himalaya** | **Mountains** | **Plains** |
| Jan | 9.7 | 18.9 | 12.8 | -13.2 | 6.8 | 16.1 |
| Feb | 15 | 28.4 | 13.3 | -12.6 | 8.6 | 19.2 |
| Mar | 20.3 | 43.7 | 13.8 | -8.8 | 12.5 | 23.9 |
| Apr | 24.3 | 92.1 | 41.9 | -4.7 | 16 | 28.4 |
| May | 36.5 | 185.7 | 112.3 | 0.2 | 18.1 | 30 |
| Jun | 69.7 | 337.2 | 247.4 | 4.4 | 19.9 | 30.4 |
| Jul | 137.8 | 540.6 | 481.3 | 7.1 | 20.2 | 29.4 |
| Aug | 147.2 | 462 | 358.8 | 6.7 | 20.2 | 29.5 |
| Sep | 78.8 | 314.7 | 259.6 | 4.2 | 19.1 | 28.8 |
| Oct | 22.9 | 84.6 | 75.7 | -1.3 | 16.1 | 26.9 |
| Nov | 5.8 | 14.2 | 5.4 | -7.7 | 11.9 | 22.7 |
| Dec | 7.1 | 16.4 | 9.7 | -11.1 | 8.5 | 18.2 |
| Annual | 575 | 2139 | 1632 | -3.1 | 14.8 | 25.3 |

**Table S3: Calibration parameters in the J2000 hydrological model**

Note: the parameters (in bold) were the 16 selected parameters for sensitivity and uncertainty analysis by Nepal et al. (2017).

| **Parameters** | **Description** | **Calibrated value** | **Normal range** | **Units** |
| --- | --- | --- | --- | --- |
| *Precipitation distribution* | |  |  |  |
| Trs | Base temperature | 0 | −1 to +1 | °C |
| Trans | Parameter range for mixed rain and snow | 2 | −2 to +2 | °C |
| *Interception module* | |  |  |  |
| a_rain | Interception storage for rain | 1 | 0–5 | mm |
| a_snow | Interception storage for snow | 1.28 | 0–5 | mm |
| *Snow module* |  |  |  |  |
| CritDens | Critical density of snow | 0.381 | 0–1 | % |
| ColdContent | Cold content of snowpack | 0.0012 | 0–1 | g/cm³ |
| **BaseTemp** | Threshold temperature for snowmelt | 0 | −5 to +5 | °C |
| **Tfactor** | Melt factor by sensible heat | 2.84 | 0–5 | NA |
| Rfactor | Melt factor by liquid precipitation | 0.21 | 0–5 | NA |
| Gfactor | Melt factor by soil heat flow | 3.73 | 0–5 | NA |
| *Glacier module* |  |  |  |  |
| **meltFactorIce** | Melt factor for ice melt | 0.5 | 0–5 | NA |
| alphaIce | Radiation melt factor for ice | 0.1 | 0–5 | NA |
| kIce | Routing coefficient for ice melt | 15 | 0–50 | NA |
| kSnow | Routing coefficient for snowmelt | 10 | 0–50 | NA |
| kRain | Routing coefficient for rainfall–run-off | 5 | 0–50 | NA |
| debrisFactor | Debris factor for ice melt | 5 | 0–10 | NA |
| **glacierTbase** | Threshold temperature for snowmelt | −1 | −5 to +5 | °C |
| *Soil module* |  |  |  |  |
| soilMaxDPS | Maximum depression storage | 2 | 0–10 | mm |
| **soilLinRed** | Linear reduction coefficient for actual evaporation | 0.6 | 0–1 |  |
| **soilMaxInfSummer** | Maximum infiltration in summer | 45 | 0–200 | mm |
| **soilMaxInfWinter** | Maximum infiltration in winter | 50 | 0–200 | mm |
| soilMaxInfSnow | Maximum infiltration in snow-covered areas | 40 | 0–200 | mm |
| soilInpLT80 | Infiltration for areas less than 80% sealing | 0.5 | 0–1 | NA |
| SoilDistMPSLPS | MPS‒LPS distribution coefficient | 0.27 | 0–10 | NA |
| SoilDiffMPSLPS | MPS‒LPS diffusion coefficient | 0.1 | 0–10 | NA |
| soilOutLPS | Outflow coefficient for LPS | 7 | 0–10 | NA |
| **soilLatVertLPS** | Lateral vertical distribution coefficient | 0.05 | 0–10 | NA |
| **soilMaxPerc** | Maximum percolation rate to groundwater | 30 | 0–100 | mm |
| **soilConcRD1Flood** | Recession coefficient for flood event | 1.1 | 1–10 | NA |
| soilConcRD1Flood threshold | Threshold value for soilConcRD1Flood | 500 | 0–500 | NA |
| **soilConcRD1** | Recession coefficient for overland flow | 1.5 | 1–10 | NA |
| **SoilConcRD2** | Recession coefficient for interflow | 1.8 | 1–10 | NA |
| *Groundwater module* |  |  |  |  |
| **gwRG1RG2dist** | RG1‒RG2 distribution coefficient | 20 | 0–5 | NA |
| **gwRG1Fact** | Adaptation factor for RG1 flow | 0.05 | 0–10 | NA |
| **gwRG2Fact** | Adaptation factor for RG2 flow | 0.18 | 0–10 | NA |
| gwCapRise | Capillary rise coefficient | 0.01 | 0–10 | NA |
| *Reach routing* |  |  |  |  |
| **flowRouteTA** | Flood routing coefficient | 30 | 0–100 | NA |

**Supplementary Figures**


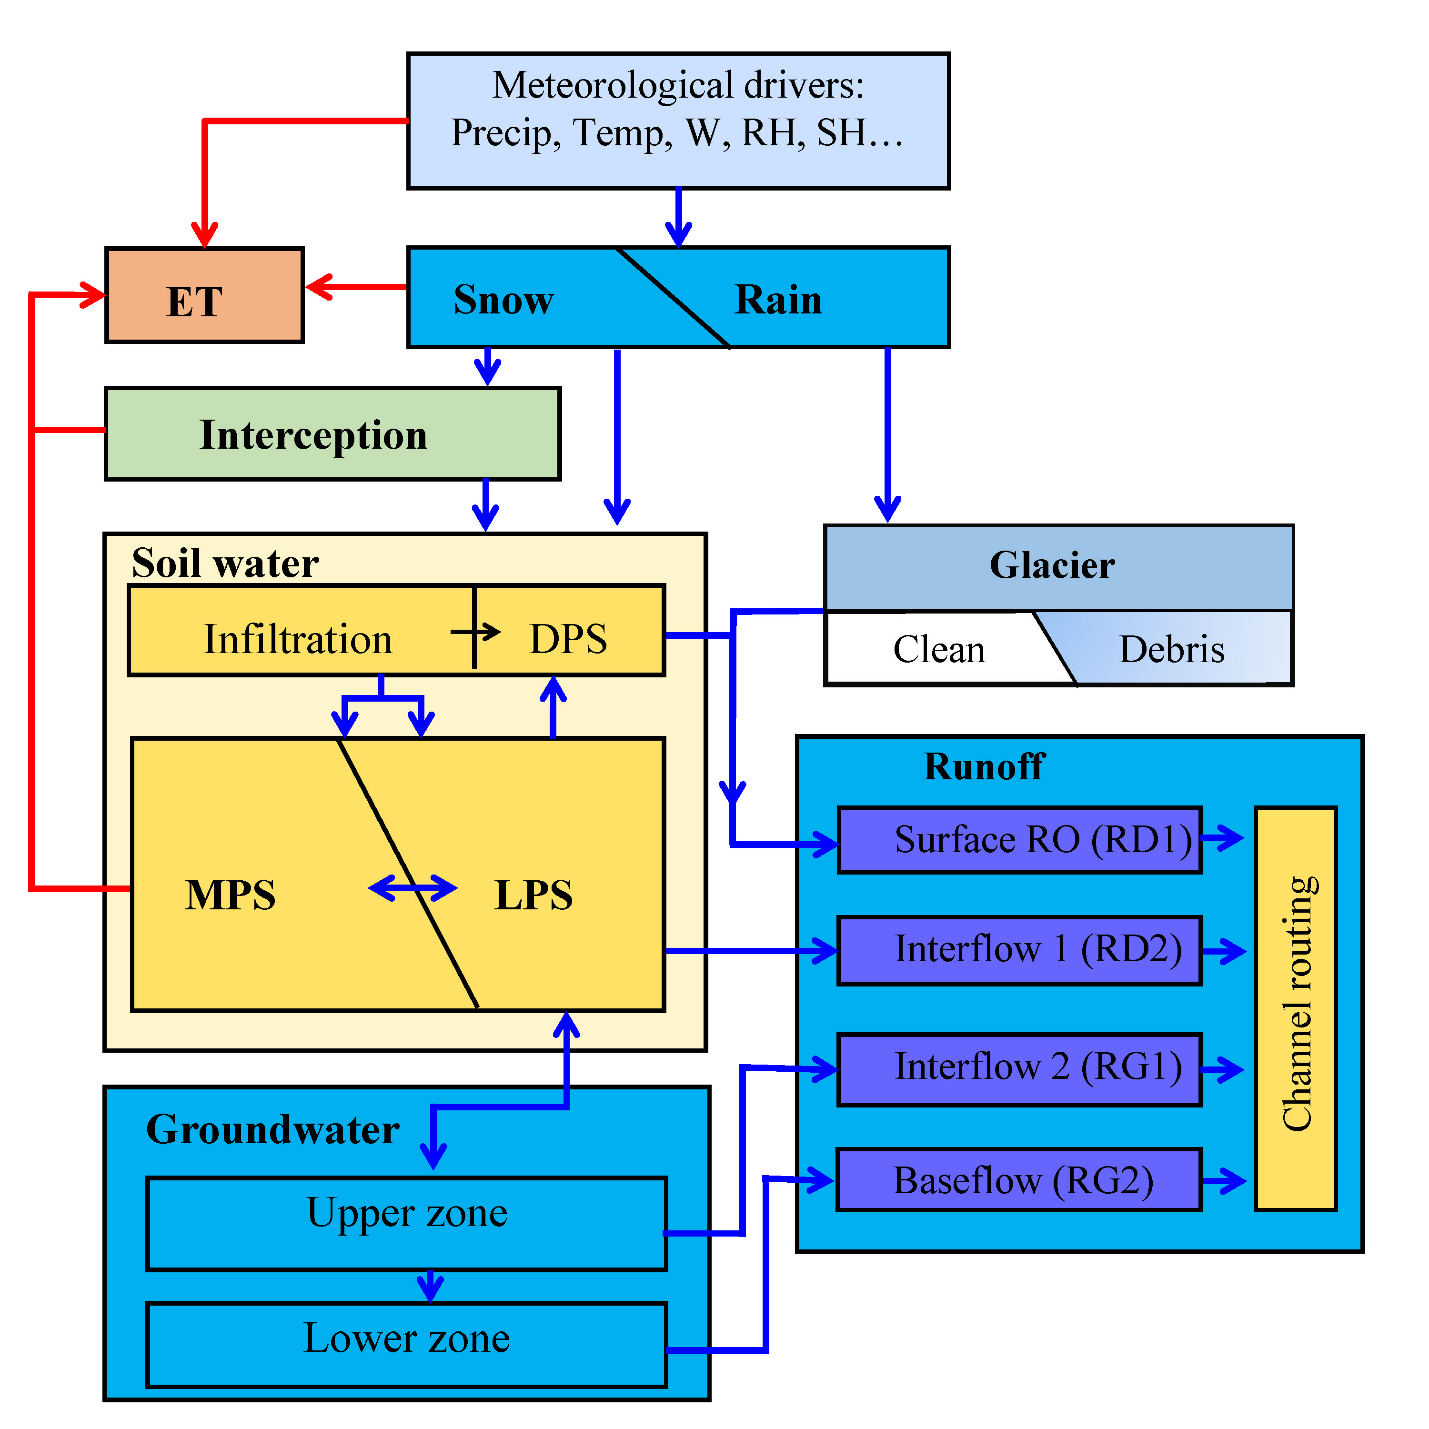


**Figure S1: Conceptual layout of the J2000 hydrological model**Sources: Adapted from Krause (2002), Krause et al. (2009) and Nepal et al. (2014)

Notes: ET = evapotranspiration, Precip = precipitation, Temp = air temperature, W = wind speed, RH = relative humidity, SH = sunshine hours, LPS = large pore storage, MPS = middle pore storage, DPS = depression storage, RO = runoff


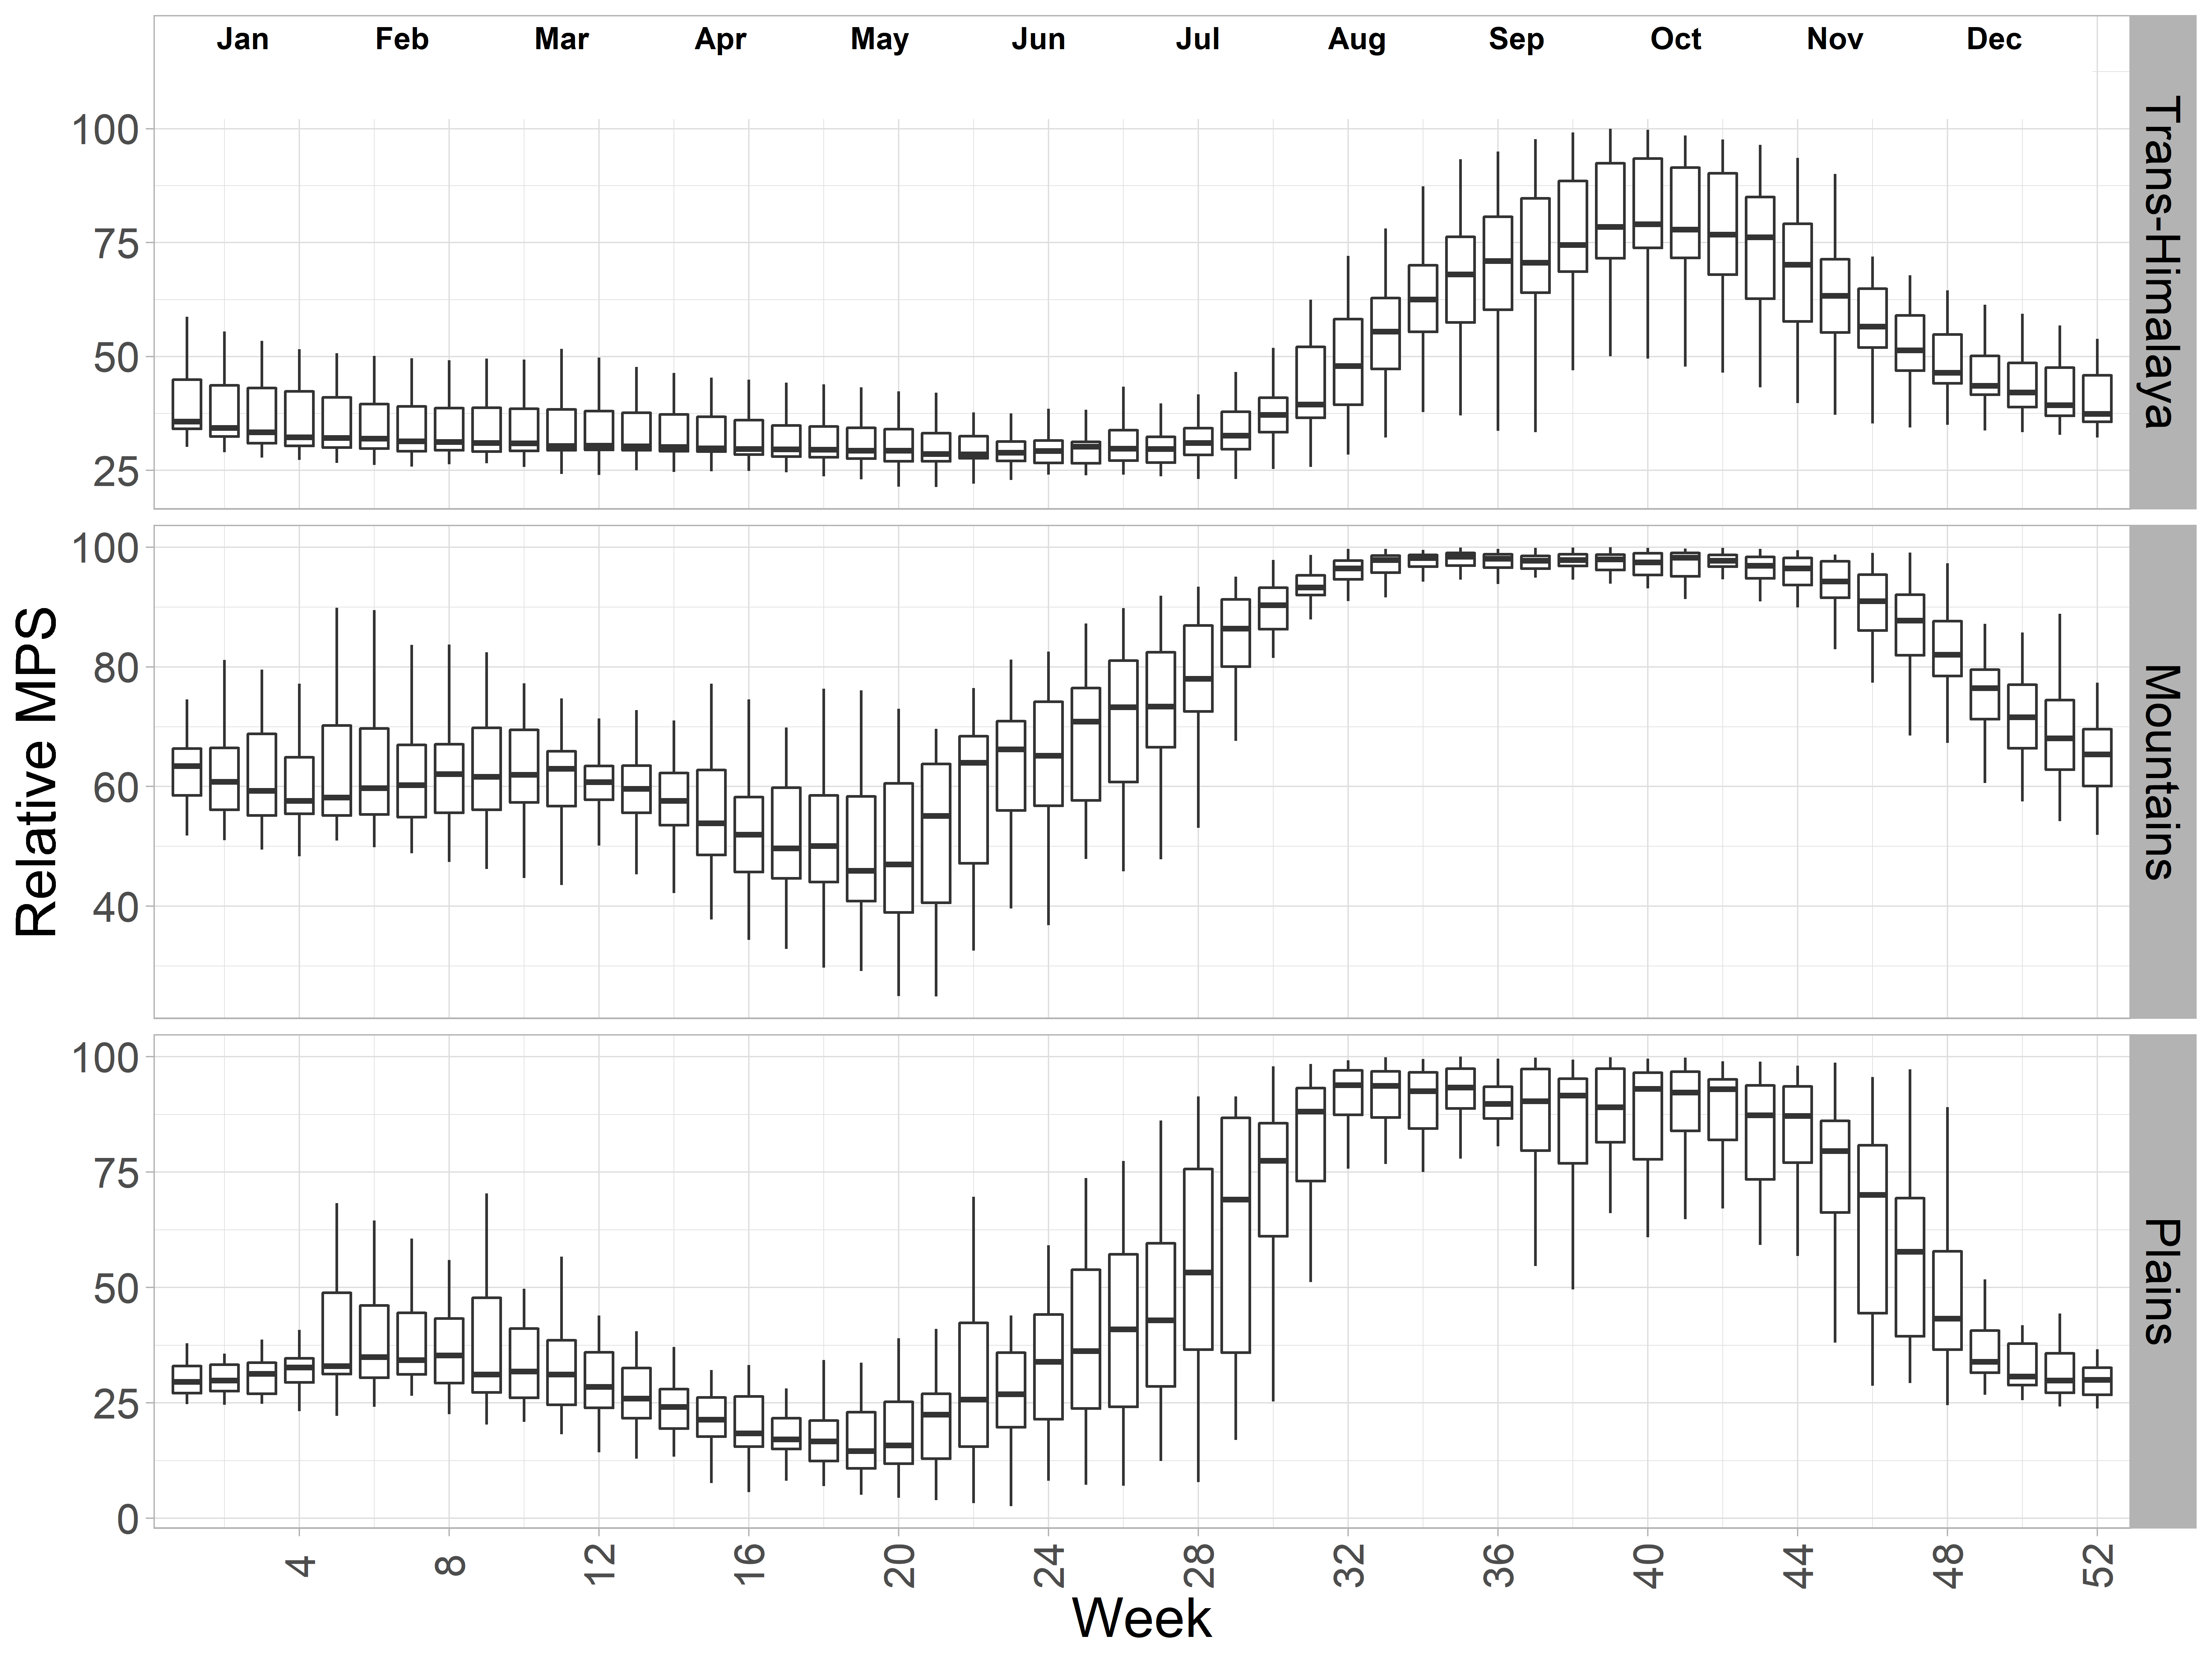


**Figure S2: Variation in weekly soil moisture for the Koshi River basin, 1980‒2007.**


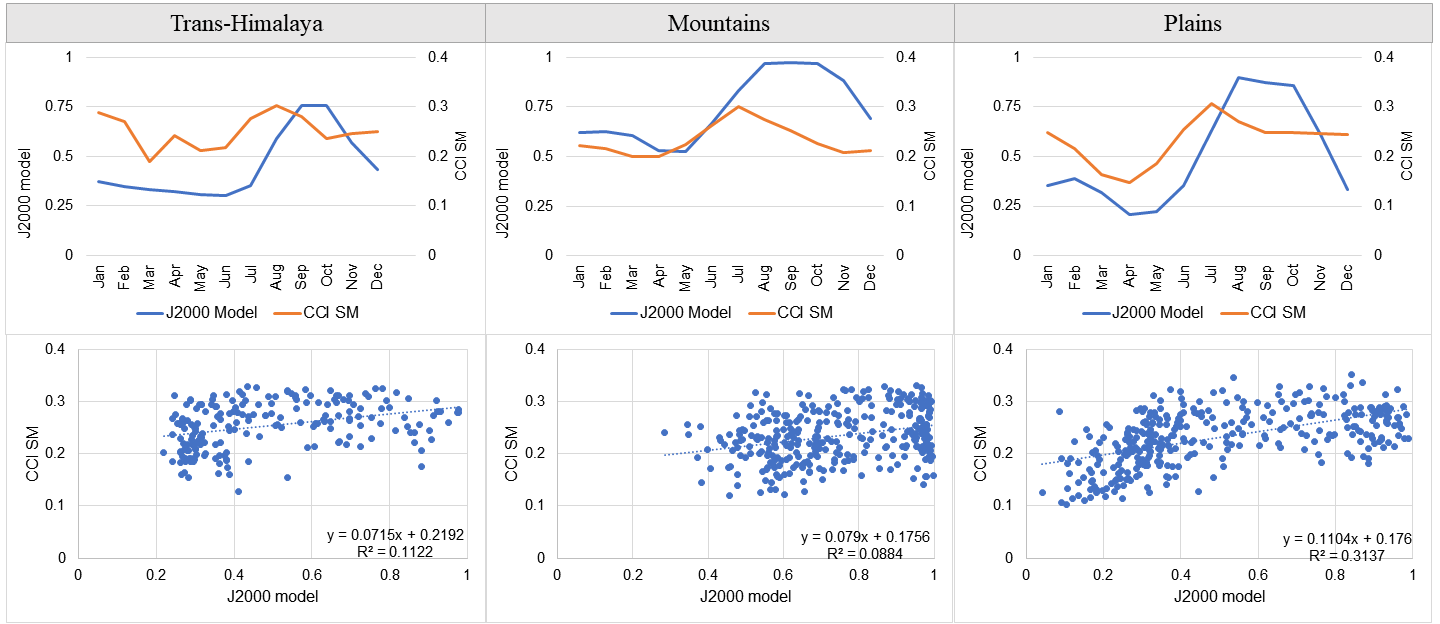


Figure S3: Comparison between soil moisture of CCI SM and J2000 model. First row: an average monthly comparison. Bottom row: scatter plot of monthly values (1980-2007).

*Note about the figure:*

*CCI SM is a daily surface soil moisture, which has a spatial resolution of 25 km x 25km, as volume percentage for top 40 cm soil layer (Liu et al., 2011; Liu et al., 2012;* *Dorigo et al. 2017). We extracted the average monthly values separately for three regions. Because of differences in soil depth (i.e 40 cm for CCI SM and up to 100 cm for the J2000 model) in the compared datasets, the fraction volume of soil moisture for each product is presented. In average, CCI SM soil moisture is about half in the trans-Himalaya and plains and one third in mountains compared to the J2000 model.*

**References:**

Liu, Y. Y., Parinussa, R. M., Dorigo, W. A., De Jeu, R. A. M., Wagner, W., van Dijk, A. I. J. M., McCabe, M. F., and Evans, J. P.: Developing an improved soil moisture dataset by blending passive and active microwave satellite-based retrievals, Hydrol. Earth Syst. Sci., 15, 425–436, https://doi.org/10.5194/hess-15-425-2011, 2011.

Liu, Y. Y., Dorigo, W. A., Parinussa, R. M., de Jeu, R. A. M., Wagner, W., McCabe, M. F., Evans, J. P., and van Dijk, A. I. J. M.: Trend-preserving blending of passive and active microwave soil moisture retrievals, Remote Sens. Environ., 123, 280–297, https://doi.org/10.1016/j.rse.2012.03.014, 2012.

Dorigo, W., Wagner, W., Albergel, C., Albrecht, F., Balsamo, G., Brocca, L., Chung, D., Ertl, M., Forkel, M., Gruber, A., Haas, E., Hamer, P. D., Hirschi, M., Ikonen, J., de Jeu, R., Kidd, R., Lahoz, W., Liu, Y. Y., Miralles, D., Mistelbauer, T., Nicolai-Shaw, N., Parinussa, R., Pratola, C., Reimer, C., van der Schalie, R., Seneviratne, S. I., Smolander, T., and Lecomte, P.: ESA CCI Soil Moisture for improved Earth system understanding: State-of-the art and future directions, Remote Sens. Environ., 203, 185–215, https://doi.org/10.1016/j.rse.2017.07.001, 2017
